# Supplementary material for: The carboxyl termini of RAN translated GGGGCC nucleotide repeat expansions modulate toxicity in models of ALS/FTD
Source: PubMed Central journal article supplement (PMC7401224; doi:10.1186/s40478-020-01002-8), 2020-08-04
Supplement: 40478_2020_1002_MOESM5_ESM.pdf [file 40478_2020_1002_MOESM5_ESM.pdf]

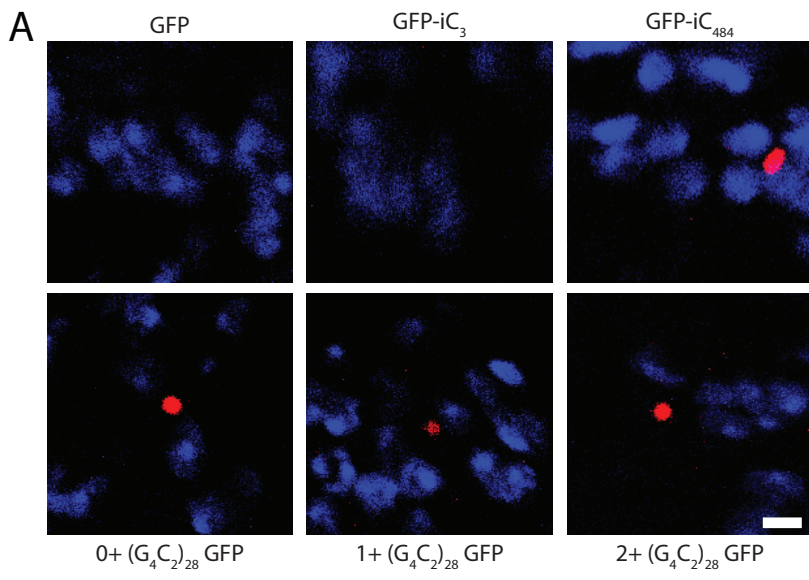

**Supplemental Figure S3: Characterization of G<sub>4</sub>C<sub>2</sub> repeat RNA foci in intronic and exonic G<sub>4</sub>C<sub>2</sub> repeat flies.** Representative images of in situ hybridization using Cy5-(G<sub>2</sub>C<sub>4</sub>)<sub>5</sub> probe in transverse sections of fly ommatidia from respective genotypes crossed to GMR-Gal4 driver. Scale bar = 20μm.
